# Supplementary material
Source: HighWire-hosted journal article supplement (https://www.rcpjournals.org/highwire/filestream/12058/field_highwire_adjunct_files/0/Powell_supplementary_material_S1.pdf)
Supplement: Powell_supplementary_material_S1.pdf [file Powell_supplementary_material_S1.pdf]

**Supplementary material S1**

**Total antibiotic use in DDD and excess DDD for each infection group**

| Infection               |                         | Number of patients (%) | Median course days (range) | Local guidance                 | NICE / TG course length recommendation            | Total DOT  | Excess DOT (%)  | DDD        | Excess DDD (%)  |
|-------------------------|-------------------------|------------------------|----------------------------|--------------------------------|---------------------------------------------------|------------|-----------------|------------|-----------------|
| CAP                     | Met inclusion criteria  | 58 (73)                | 7 (5-13)                   | 5-7 days dependant on severity | 5 days if appropriate response                    | 491        | 154 (31)        | 716        | 313 (44)        |
| CAP                     | Met exclusion criteria* | 21                     | 7 (5-13)                   |                                |                                                   | 117        |                 | 259        | NA              |
| <b>Total CAP</b>        |                         | <b>79</b>              | <b>7 (5-13)</b>            |                                |                                                   | <b>608</b> | <b>154 (25)</b> | <b>975</b> | <b>313 (32)</b> |
| HAP                     | Met inclusion criteria  | 20 (71)                | 7 (5-10)                   | 5-7 days dependant on severity | 5 if appropriate response                         | 117        | 42 (36)         | 224        | 70 (31)         |
| HAP                     | Met exclusion criteria* | 8                      | 11 (7-12)                  |                                |                                                   | 88         |                 | 131        | NA              |
| <b>Total HAP</b>        |                         | <b>28</b>              | <b>7 (5-12)</b>            |                                |                                                   | <b>223</b> | <b>42 (19)</b>  | <b>355</b> | <b>70 (20)</b>  |
| IECOPD                  | Met inclusion criteria  | 33 (100)               | 7 (5-9)                    | 5 days                         | 5 days                                            | 162        | 37 (23)         | 326        | 45 (14)         |
| IECOPD                  | Met exclusion criteria* | 0                      |                            |                                |                                                   | 0          |                 |            |                 |
| <b>Total IECOPD</b>     |                         | <b>33</b>              | <b>7 (5-9)</b>             |                                |                                                   | <b>162</b> | <b>37 (23)</b>  | <b>326</b> | <b>45 (14)</b>  |
| Cellulitis              | Met inclusion criteria  | 7 (58)                 | 8.5 (5-11)                 | 7-10 days                      | 5-7 days (audit standard 5 days)                  | 51         | 25 (49)         | 111.5      | 26 (23)         |
| Cellulitis              | Met exclusion criteria* | 5                      | 11.5 (7-22)                |                                |                                                   | 77         |                 | 118.5      | NA              |
| <b>Total cellulitis</b> |                         | <b>12</b>              | <b>9 (5-22)</b>            |                                |                                                   | <b>128</b> | <b>25 (20)</b>  | <b>230</b> | <b>26 (11)</b>  |
| Pyelonephritis          | Met inclusion criteria  | 14 (88)                | 7 (5-13)                   | 7-10 days                      | 7 days if quinolones and 7-10 days if beta-lactam | 107        | 20 (19)         | 249        | 29 (12)         |

|                                                          |                         |            |                           |            |                                                       |             |                 |             |                 |
|----------------------------------------------------------|-------------------------|------------|---------------------------|------------|-------------------------------------------------------|-------------|-----------------|-------------|-----------------|
| Pyelonephritis                                           | Met exclusion criteria* | 2          | 12 (12-14)                |            |                                                       | 32          |                 | 34          | NA              |
| <b>Total pyelonephritis</b>                              |                         | <b>16</b>  | <b>7 (5-14)</b>           |            |                                                       | <b>139</b>  | <b>20 (14)</b>  | <b>283</b>  | <b>29 (10)</b>  |
| Cholangitis                                              | Met inclusion criteria  | 5 (100)    | 4 (3-10)                  | None given | 4–7 days after source control (audit standard 4 days) | 26          | 0               | 80          | 0 (0)           |
| Cholangitis                                              | Met exclusion criteria* | 0          |                           |            |                                                       | 0           |                 | NA          | NA              |
| <b>Total cholangitis</b>                                 |                         | <b>5</b>   | <b>4 (3-10)</b>           |            |                                                       | <b>26</b>   | <b>0 (0)</b>    | <b>80</b>   | <b>0 (0)</b>    |
| <b>Total number of patients meeting case definition.</b> |                         | <b>173</b> |                           |            |                                                       | <b>1286</b> | <b>278 (22)</b> | <b>2249</b> | <b>483 (21)</b> |
| Total for study cohort                                   |                         | <b>307</b> | <b>Data not collected</b> |            |                                                       |             |                 | <b>3884</b> | <b>483 (12)</b> |

\*either due to co-morbidities or short course length criteria not met. "Local Guidance" is study hospital's antibiotic course length recommendation at time of study.

TG = Tokyo guidelines; DOT = duration of therapy.

Where NICE guidance offered a course length range we selected the shortest option; cellulitis 5 days because it is possible to monitor response to therapy in hospital; pyelonephritis 7 days because local guideline choice was ciprofloxacin at time of audit and because if a beta-lactam was prescribed 7 days is still in line with NICE
